# Supplementary material for: Sex Chromosomes of the Iconic Moth Abraxas grossulariata (Lepidoptera, Geometridae) and Its Congener A. sylvata
Source: MDPI journal article supplement (doi:10.3390/genes9060279), 2018-05-31
Supplement: s1 [file s1]

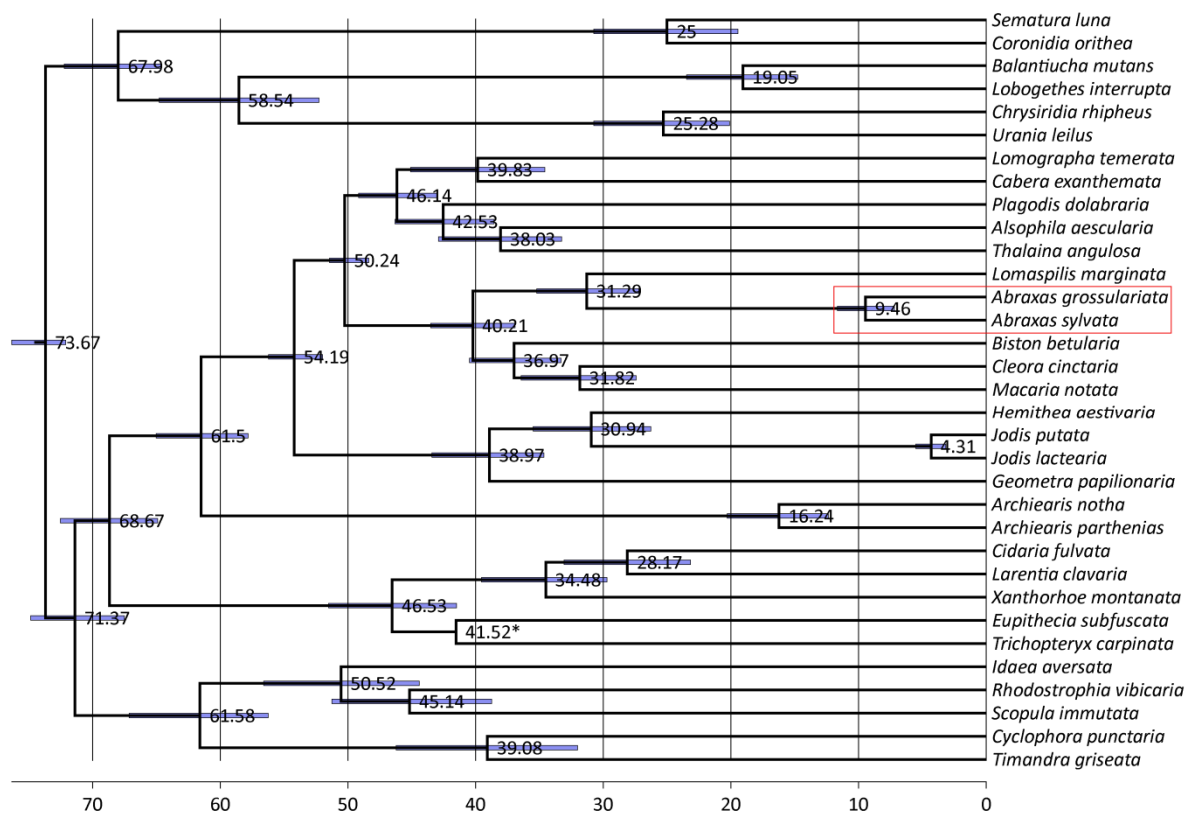

**Figure S4.** Timed phylogenetic tree of the Geometroidea. Numbers represent the exact age, and the blue bars indicate 95% confidence interval for each node. Node indicated with an asterisk (\*) had very low posterior probability. Target group (*Abraxas* spp.) is indicated by a red quadrangle. Scale: millions of years.
