# Supplementary material for: Sex Chromosomes of the Iconic Moth Abraxas grossulariata (Lepidoptera, Geometridae) and Its Congener A. sylvata
Source: MDPI journal article supplement (doi:10.3390/genes9060279), 2018-05-31
Supplement: s1 [file s1]

**Table S2.** Calibration points used for calculating the age of the split between *Abraxas* spp. Numbers indicate the start value and the upper and lower boundaries of the prior following uniform distribution for each calibration point.

| Taxon set                                             | First run             |                       | Final run        |                  |
|-------------------------------------------------------|-----------------------|-----------------------|------------------|------------------|
|                                                       | Start value           | Boundaries            | Start value      | Boundaries       |
| Geometroidea                                          | 82.7                  | 72.1-93.0             | 82.7             | 72.1-93.0        |
| Uraniidae+Sematuridae                                 | 76.2                  | 64.6-87.9             | 76.2             | 64.6-87.9        |
| Geometridae                                           | 71.5                  | 60.9-82.6             | 71.5             | 60.9-82.6        |
| Archiearinae+Geometrinae+Ennominae                    | 60.5                  | 49.0-71.5             | 60.6             | 49.0-71.5        |
| Geometrinae+Ennominae                                 | 46.1                  | 35.8-56.2             | 46.1             | 35.8-56.2        |
| Geometrinae                                           | Using tree prior      | Using tree prior      | Using tree prior | Using tree prior |
| Ennominae                                             | Using tree prior      | Using tree prior      | 40.9             | 30.6-51.4        |
| <i>Alsophila</i> + <i>Thalaina</i>                    | Taxon set not defined | Taxon set not defined | 32.9             | 21.4-43.6        |
| <i>Abraxas grossulariata</i> + <i>Abraxas sylvata</i> | Taxon set not defined | Taxon set not defined | Using tree prior | Using tree prior |
