# Supplementary material for: Sex Chromosomes of the Iconic Moth Abraxas grossulariata (Lepidoptera, Geometridae) and Its Congener A. sylvata
Source: MDPI journal article supplement (doi:10.3390/genes9060279), 2018-05-31
Supplement: s1 [file s1]

**Table S1.** Sequences used in the molecular phylogenetic analyses. Authorships of the sequences downloaded from GenBank are indicated by lowercase letters<sup>a-k</sup> and the relevant publications are listed below. Sequences that were not available for analyses are indicated by ×.

| Species                      | Gene                                             |                                                  |                       |                       |                       |                        |                       |                       |
|------------------------------|--------------------------------------------------|--------------------------------------------------|-----------------------|-----------------------|-----------------------|------------------------|-----------------------|-----------------------|
|                              | <i>COI</i>                                       | <i>EF-1α</i>                                     | <i>WGL</i>            | <i>GAPDH</i>          | <i>RpS5</i>           | <i>IDH</i>             | <i>MDH</i>            | <i>CAD</i>            |
| <b>SEMATURIDAE</b>           |                                                  |                                                  |                       |                       |                       |                        |                       |                       |
| <i>Coronidia orithea</i>     | GU828523 <sup>c</sup> ,<br>GU828327 <sup>c</sup> | GU828869 <sup>c</sup> ,<br>GU829171 <sup>c</sup> | ×                     | GU829715 <sup>c</sup> | GU830559 <sup>c</sup> | GU829914 <sup>c</sup>  | GU830247 <sup>c</sup> | GU828035 <sup>c</sup> |
| <i>Sematura luna</i>         | GU828862 <sup>c</sup> ,<br>GU929824 <sup>c</sup> | GU829165 <sup>c</sup> ,<br>GU829427 <sup>c</sup> | ×                     | GU829912 <sup>c</sup> | GU830809 <sup>c</sup> | GU830240 <sup>c</sup>  | GU830554 <sup>c</sup> | GU828322 <sup>c</sup> |
| <b>URANIIDAE</b>             |                                                  |                                                  |                       |                       |                       |                        |                       |                       |
| <i>Balantiucha mutans</i>    | GU828806 <sup>c</sup> ,<br>GU929776 <sup>c</sup> | GU829111 <sup>c</sup> ,<br>GU829388 <sup>c</sup> | GU829665 <sup>c</sup> | GU829881 <sup>c</sup> | ×                     | GU830187 <sup>c</sup>  | GU830505 <sup>c</sup> | GU828278 <sup>c</sup> |
| <i>Lobogethes interrupta</i> | GU828807 <sup>c</sup> ,<br>GU929777 <sup>c</sup> | GU829112 <sup>c</sup> ,<br>GU829389 <sup>c</sup> | GU829666 <sup>c</sup> | GU829882 <sup>c</sup> | ×                     | GU830188 <sup>c</sup>  | GU830506 <sup>c</sup> | GU828279 <sup>c</sup> |
| <i>Urania leilus</i>         | DQ018927 <sup>j</sup>                            | DQ018898 <sup>j</sup>                            | DQ018868 <sup>j</sup> | ×                     | EU141430 <sup>i</sup> | EU141589 <sup>i</sup>  | EU141653 <sup>i</sup> | EU141351 <sup>i</sup> |
| <i>Chrysiridia rhipheus</i>  | GU828839 <sup>c</sup> ,<br>GU929803 <sup>c</sup> | GU829140 <sup>c</sup> ,<br>GU829410 <sup>c</sup> | GU829690 <sup>c</sup> | GU829900 <sup>c</sup> | GU830788 <sup>c</sup> | GU830219 <sup>c</sup>  | GU830530 <sup>c</sup> | JF785274 <sup>g</sup> |
| <b>GEOMETRIDAE</b>           |                                                  |                                                  |                       |                       |                       |                        |                       |                       |
| <b>Archiearinae</b>          |                                                  |                                                  |                       |                       |                       |                        |                       |                       |
| <i>Archiearis notha</i>      | KX343539 <sup>f</sup>                            | KX343683 <sup>f</sup>                            | KX343624 <sup>f</sup> | ×                     | KX343275 <sup>f</sup> | KX343349 <sup>f</sup>  | ×                     | ×                     |
| <i>Archiearis parthenias</i> | KX343538 <sup>f</sup>                            | DQ018899 <sup>j</sup>                            | KX343623 <sup>f</sup> | EU141485 <sup>i</sup> | EU141381 <sup>i</sup> | EU1415392 <sup>i</sup> | EU141604 <sup>i</sup> | JF785273 <sup>g</sup> |
| <b>Geometrinae</b>           |                                                  |                                                  |                       |                       |                       |                        |                       |                       |
| <i>Geometra papilionaria</i> | KX343540 <sup>f</sup>                            | GU580809 <sup>k</sup>                            | KX343625 <sup>f</sup> | GU580821 <sup>k</sup> | GU830656 <sup>c</sup> | GU830046 <sup>c</sup>  | KX343746 <sup>f</sup> | KX343819 <sup>f</sup> |
| <i>Hemithea aestivaria</i>   | KX788614 <sup>a</sup>                            | KX788718 <sup>a</sup>                            | JF785123 <sup>g</sup> | JF785454 <sup>g</sup> | JF785007 <sup>g</sup> | JF785531 <sup>g</sup>  | JF784898 <sup>g</sup> | JF785256 <sup>g</sup> |
| <i>Jodis lactearia</i>       | MG767763 <sup>b</sup>                            | MG768161 <sup>b</sup>                            | MG767317 <sup>b</sup> | MG767567 <sup>b</sup> | MG767394 <sup>b</sup> | MG768382 <sup>b</sup>  | MG768003 <sup>b</sup> | MG768546 <sup>b</sup> |
| <i>Jodis putata</i>          | KX343541 <sup>f</sup>                            | KX343684 <sup>f</sup>                            | GU593342 <sup>k</sup> | KX343408 <sup>f</sup> | JF784987 <sup>g</sup> | GU580853 <sup>k</sup>  | KX343747 <sup>f</sup> | KX343820 <sup>f</sup> |
| <b>Ennominae</b>             |                                                  |                                                  |                       |                       |                       |                        |                       |                       |
| <i>Abraxas grossulariata</i> | HQ340174 <sup>e</sup>                            | HQ340207 <sup>e</sup>                            | HQ340234 <sup>e</sup> | HQ340216 <sup>e</sup> | ×                     | JF785523 <sup>g</sup>  | ×                     | JF785240 <sup>g</sup> |
| <i>Abraxas sylvata</i>       | MH423813 <sup>*</sup>                            | GU580800 <sup>k</sup>                            | GU593336 <sup>k</sup> | GU580830 <sup>k</sup> | GU580668 <sup>k</sup> | MH423823 <sup>*</sup>  | MH423826 <sup>*</sup> | MH423829 <sup>*</sup> |

|                                |                                                  |                                                  |                       |                       |                       |                       |                       |                       |
|--------------------------------|--------------------------------------------------|--------------------------------------------------|-----------------------|-----------------------|-----------------------|-----------------------|-----------------------|-----------------------|
| <i>Alsophila aescularia</i>    | GU580755 <sup>k</sup>                            | GU580794 <sup>k</sup>                            | GU593332 <sup>k</sup> | ×                     | ×                     | GU580856 <sup>k</sup> | GU830326 <sup>c</sup> | ×                     |
| <i>Biston betularia</i>        | EF206681 <sup>h</sup>                            | EF206673 <sup>h</sup>                            | GU829589 <sup>c</sup> | GU580832 <sup>k</sup> | GU580670 <sup>k</sup> | GU580867 <sup>k</sup> | GU830417 <sup>c</sup> | JF785230 <sup>g</sup> |
| <i>Cabera exanthemata</i>      | KX788605 <sup>a</sup>                            | KX788710 <sup>a</sup>                            | ×                     | JF785452 <sup>g</sup> | JF785001 <sup>g</sup> | JF785509 <sup>g</sup> | JF784892 <sup>g</sup> | JF785216 <sup>g</sup> |
| <i>Cleora cinctaria</i>        | GU580763 <sup>k</sup>                            | GU580801 <sup>k</sup>                            | GU593337 <sup>k</sup> | GU580831 <sup>k</sup> | GU580669 <sup>k</sup> | GU580866 <sup>k</sup> | JF784867 <sup>g</sup> | JF785215 <sup>g</sup> |
| <i>Lomaspilis marginata</i>    | GU580777 <sup>k</sup>                            | GU580813 <sup>k</sup>                            | ×                     | JF785434 <sup>g</sup> | GU580685 <sup>k</sup> | GU580877 <sup>k</sup> | JF784865 <sup>g</sup> | JF785212 <sup>g</sup> |
| <i>Lomographa temerata</i>     | MH423814 <sup>*</sup>                            | HQ340210 <sup>e</sup>                            | HQ340237 <sup>e</sup> | MH423818 <sup>*</sup> | HQ340228 <sup>e</sup> | HQ340220 <sup>e</sup> | ×                     | MH423830 <sup>*</sup> |
| <i>Macaria notata</i>          | MH423815 <sup>*</sup>                            | MH423816 <sup>*</sup>                            | MH423817 <sup>*</sup> | MH423819 <sup>*</sup> | MH423821 <sup>*</sup> | MH423824 <sup>*</sup> | MH423827 <sup>*</sup> | MH423831 <sup>*</sup> |
| <i>Plagodis dolabraria</i>     | KX788622 <sup>a</sup>                            | KX788726 <sup>a</sup>                            | KX788764 <sup>a</sup> | KX788747 <sup>a</sup> | KX788788 <sup>a</sup> | KX788643 <sup>a</sup> | KX788809 <sup>a</sup> | KX788598 <sup>a</sup> |
| <i>Thalaina angulosa</i>       | GU828797 <sup>c</sup> ,<br>GU929767 <sup>c</sup> | GU829103 <sup>c</sup> ,<br>GU829382 <sup>c</sup> | GU829656 <sup>c</sup> | GU829875 <sup>c</sup> | ×                     | GU830178 <sup>c</sup> | GU830498 <sup>c</sup> | GU828271 <sup>c</sup> |
| <b>Larentiinae</b>             |                                                  |                                                  |                       |                       |                       |                       |                       |                       |
| <i>Cidaria fulvata</i>         | KX343553 <sup>f</sup>                            | KX343692 <sup>f</sup>                            | KX343632 <sup>f</sup> | KX343421 <sup>f</sup> | KX343286 <sup>f</sup> | KX343360 <sup>f</sup> | KX343759 <sup>f</sup> | KX343832 <sup>f</sup> |
| <i>Eupithecia subfuscata</i>   | KX343576 <sup>f</sup>                            | KX343709 <sup>f</sup>                            | KX343647 <sup>f</sup> | KX343437 <sup>f</sup> | KX343306 <sup>f</sup> | KX343374 <sup>f</sup> | KX343773 <sup>f</sup> | KX343851 <sup>f</sup> |
| <i>Larentia clavaria</i>       | KX343583 <sup>f</sup>                            | KX343715 <sup>f</sup>                            | KX343653 <sup>f</sup> | KX343443 <sup>f</sup> | KX343313 <sup>f</sup> | GU830070 <sup>c</sup> | GU830387 <sup>c</sup> | JF785226 <sup>g</sup> |
| <i>Trichopteryx carpinata</i>  | EU443349 <sup>d</sup>                            | EU443287 <sup>d</sup>                            | EU443308 <sup>d</sup> | KX343461 <sup>f</sup> | KX343335 <sup>f</sup> | KX343395 <sup>f</sup> | KX343806 <sup>f</sup> | JF785229 <sup>g</sup> |
| <i>Xanthorhoe montanata</i>    | KX343615 <sup>f</sup>                            | KX343738 <sup>f</sup>                            | KX343675 <sup>f</sup> | KX343468 <sup>f</sup> | KX343342 <sup>f</sup> | KX343402 <sup>f</sup> | KX343812 <sup>f</sup> | KX343887 <sup>f</sup> |
| <b>Sterrhinae</b>              |                                                  |                                                  |                       |                       |                       |                       |                       |                       |
| <i>Cyclophora punctaria</i>    | EU443361 <sup>d</sup>                            | EU443298 <sup>d</sup>                            | EU443318 <sup>d</sup> | ×                     | KX788769 <sup>a</sup> | KX788629 <sup>a</sup> | KX788791 <sup>a</sup> | KX788584 <sup>a</sup> |
| <i>Idaea aversata</i>          | EU443357 <sup>d</sup>                            | EU443294 <sup>d</sup>                            | EU443315 <sup>d</sup> | KX343410 <sup>f</sup> | KX343277 <sup>f</sup> | KX343351 <sup>f</sup> | KX343749 <sup>f</sup> | KX343822 <sup>f</sup> |
| <i>Rhodostrophia vibicaria</i> | EU443354 <sup>d</sup>                            | EU443292 <sup>d</sup>                            | EU443313 <sup>d</sup> | ×                     | KX788771 <sup>a</sup> | KX788630 <sup>a</sup> | KX788792 <sup>a</sup> | KX788585 <sup>a</sup> |
| <i>Scopula immutata</i>        | KX788627 <sup>a</sup>                            | KX788731 <sup>a</sup>                            | KX788767 <sup>a</sup> | MH423820 <sup>*</sup> | MH423822 <sup>*</sup> | MH423825 <sup>*</sup> | MH423828 <sup>*</sup> | MH423832 <sup>*</sup> |
| <i>Timandra griseata</i>       | EU443362 <sup>d</sup>                            | EU443299 <sup>d</sup>                            | EU443319 <sup>d</sup> | KX788733 <sup>a</sup> | KX788772 <sup>a</sup> | KX788631 <sup>a</sup> | JF784893 <sup>g</sup> | JF785252 <sup>g</sup> |

\* This study

<sup>a</sup> Holm, S.; Davis, R.B.; Javoiš, J.; Öunap, E.; Kaasik, A.; Molleman, F.; Tammaru, T. A comparative perspective on longevity: the effect of body size dominates over ecology in moths. *J. Evol. Biol.* **2016**, 29, 2422–2435. doi: 10.1111/jeb.12966

<sup>b</sup> Holm, S.; Javoiš, J.; Öunap, E.; Davis, R.; Kaasik, A.; Molleman, F.; Tasane, T.; Tammaru, T. Reproductive behaviour indicates specificity in resource use: phylogenetic examples from temperate and tropical insects. *Oikos* **2018**. First published: 27 February 2018. doi: 10.1111/oik.04959

- <sup>c</sup> Mutanen, M.; Wahlberg, N.; Kaila, L. Comprehensive gene and taxon coverage elucidates radiation patterns in moths and butterflies. *Proc. Biol. Sci.* **2010**, 277, 2839–2848. doi: 10.1098/rspb.2010.0392
- <sup>d</sup> Õunap, E.; Viidalepp, J.; Saarma, U. Systematic position of Lythriini revised: transferred from Larentiinae to Sterrhinae (Lepidoptera, Geometridae). *Zool. Scr.* **2008**, 37, 405–413.
- <sup>e</sup> Õunap, E.; Javoiš, J.; Viidalepp, J.; Tammaru, T. Phylogenetic relationships of selected European Ennominae (Lepidoptera: Geometridae). *Eur. J. Entomol.* **2011**, 108, 267–273. doi: 10.14411/eje.2011.036
- <sup>f</sup> Õunap, E.; Viidalepp, J.; Truuverk, A. Phylogeny of the subfamily Larentiinae (Lepidoptera: Geometridae): integrating molecular data and traditional classifications. *Syst. Entomol.* **2016**, 41, 824–843. doi.org/10.1111/syen.12195
- <sup>g</sup> Sihvonen, P.; Mutanen, M.; Kaila, L.; Brehm, G.; Hausmann, A.; Staude, H.S. Comprehensive molecular sampling yields a robust phylogeny for geometrid moths (Lepidoptera: Geometridae). *PLoS One* **2011**, 6, e20356. doi: 10.1371/journal.pone.0020356
- <sup>h</sup> Viidalepp, J.; Tammaru, T.; Snäll, N.; Ruohomäki, K.; Wahlberg, N. *Cleorodes* Warren, 1894 does not belong in the tribe Boarmiini (Lepidoptera: Geometridae). *Eur. J. Entomol.* **2007**, 104, 303–309. doi: 10.14411/eje.2007.046
- <sup>i</sup> Wahlberg, N.; Wheat, C.W. Genomic outposts serve the phylogenomic pioneers: designing novel nuclear markers for genomic DNA extractions of Lepidoptera. *Syst. Biol.* **2008**, 57, 231–242. doi: 10.1080/10635150802033006
- <sup>j</sup> Wahlberg, N.; Braby, M.F.; Brower, A.V.Z.; de Jong, R.; Lee, M.M.; Nylin, S.; Pierce, N.E.; Sperling, F.A.H.; Vila, R.; Warren, A.D.; Zakharov, E. Synergistic effects of combining morphological and molecular data in resolving the phylogeny of butterflies and skippers. *Proc. Biol. Sci.* **2005**, 272, 1577–1586. doi: 10.1098/rspb.2005.3124
- <sup>k</sup> Wahlberg, N.; Snäll, N.; Viidalepp, J.; Ruohomäki, K.; Tammaru, T. The evolution of female flightlessness among Ennominae of the Holarctic forest zone (Lepidoptera, Geometridae). *Mol. Phylogenet. Evol.* **2010**, 55, 929–938. doi: 10.1016/j.ympev.2010.01.025
