# Supplementary material for: Sex Chromosomes of the Iconic Moth Abraxas grossulariata (Lepidoptera, Geometridae) and Its Congener A. sylvata
Source: MDPI journal article supplement (doi:10.3390/genes9060279), 2018-05-31
Supplement: s1 [file s1]

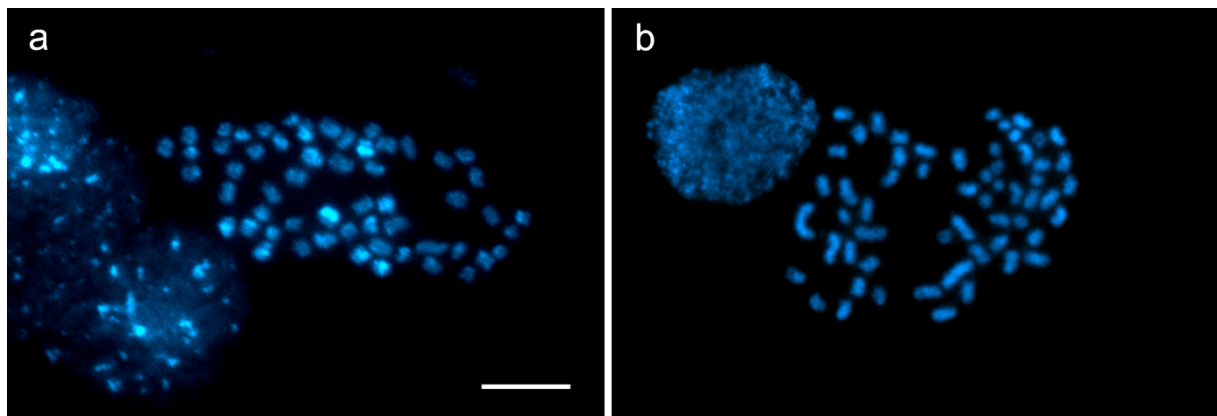

**Figure S1.** Mitotic chromosomes of *Abraxas* species stained with DAPI. **a** Metaphase of *A. grossulariata* female ( $2n = 56$ ). **b** Metaphase of *A. sylvata* male ( $2n = 58$ ). Bar = 10  $\mu\text{m}$ .
